# Supplementary material for: Advances in Breast Cancer Management and Extracellular Vesicle Research, a Bibliometric Analysis
Source: MDPI journal article supplement (doi:10.3390/curroncol28060382), 2021-11-08
Supplement: s1 [file s1]

# Advances in Breast Cancer Management and Extracellular Vesicle Research, a Bibliometric Analysis

Ramon Handerson Gomes Teles, Rafael Sussumu Yano, Nicolas Jones Villarinho, Ana Sayuri Yamagata, Ruy Gastaldoni Jaeger, Patrick Meybohm, Malgorzata Burek and Vanessa Morais Freitas

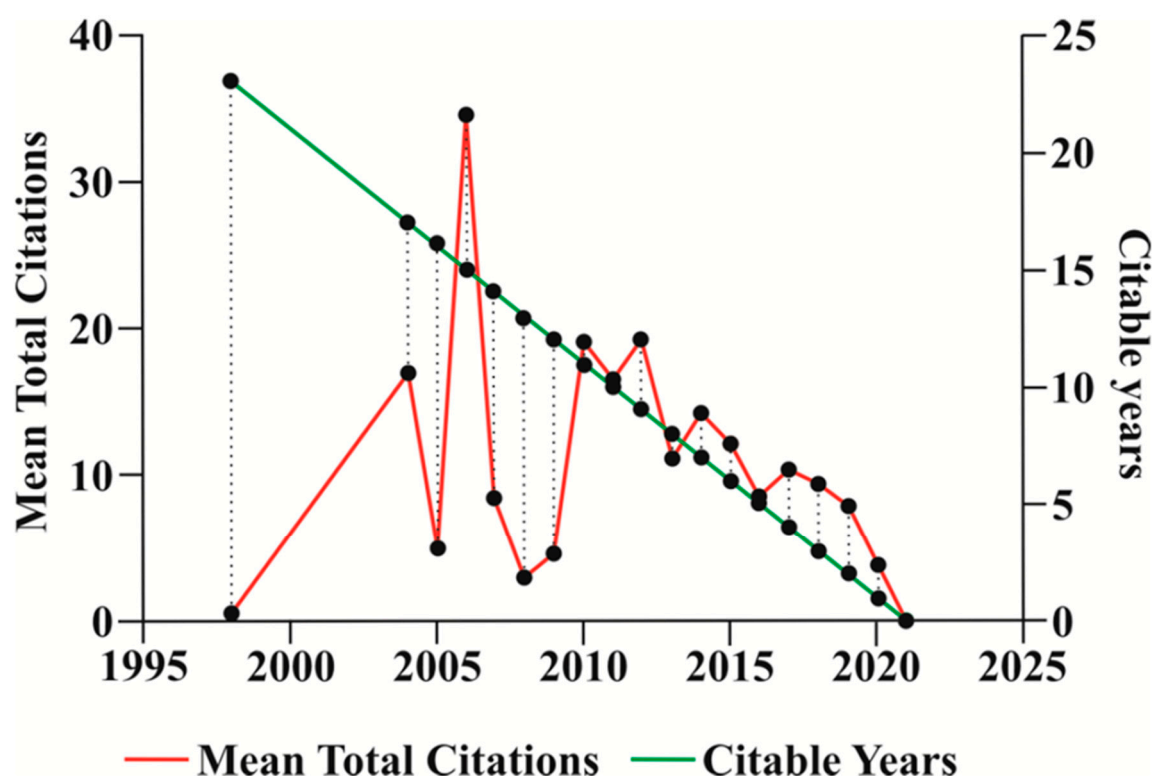

Figure S1. Annual Scientific Production and Average Citation per year .

Table S1. Annual Scientific Production.

| Year | N  | Mean Total Citation per Article | Mean Total Citation per Year | Citable Years |
|------|----|---------------------------------|------------------------------|---------------|
| 1998 | 1  | 16                              | 0.69                         | 23            |
| 2004 | 1  | 290                             | 17.05                        | 17            |
| 2005 | 5  | 80                              | 5                            | 16            |
| 2006 | 2  | 520.5                           | 34.7                         | 15            |
| 2007 | 3  | 123                             | 8.78                         | 14            |
| 2008 | 3  | 33.3                            | 2.56                         | 13            |
| 2009 | 3  | 55.6                            | 4.63                         | 12            |
| 2010 | 8  | 210.6                           | 19.14                        | 11            |
| 2011 | 9  | 165                             | 16.5                         | 10            |
| 2012 | 16 | 174.2                           | 19.36                        | 9             |
| 2013 | 41 | 89                              | 11.12                        | 8             |
| 2014 | 64 | 100.7                           | 14.39                        | 7             |
| 2015 | 68 | 73.5                            | 12.26                        | 6             |
| 2016 | 95 | 43.1                            | 8.62                         | 5             |

|      |     |      |       |   |
|------|-----|------|-------|---|
| 2017 | 109 | 41.9 | 10.48 | 4 |
| 2018 | 163 | 28.2 | 9.41  | 3 |
| 2019 | 205 | 15.8 | 7.94  | 2 |
| 2020 | 299 | 3.93 | 3.93  | 1 |
| 2021 | 56  | 0.05 | -     | 0 |

**Table S2.** Journals with the highest number of publications.

| ISSN      | Journal                                     | Documents | Impact Factor (2020) |
|-----------|---------------------------------------------|-----------|----------------------|
| 1422-0067 | International Journal of Molecular Sciences | 38        | 4.556                |
| 1949-2553 | Oncotarget                                  | 37        | 5.168*               |
| 2045-2322 | Scientific Reports                          | 32        | 3.998                |
| 2072-6694 | Cancers                                     | 29        | 6.126                |
| 2234-943X | Frontiers in Oncology                       | 23        | 4.848                |
| 1932-6203 | Plos One                                    | 21        | 2.776                |
| 1538-7447 | Cancer Research                             | 18        | 9.727                |
| 1097-4652 | Journal of Cellular Physiology              | 15        | 5.546                |
| 2001-3078 | Journal of Extracellular Vesicles           | 15        | 14.976               |

\*Last impact factor calculated in 2016.

**Table S3.** Most cited sources.

| ISSN      | Journal                         | Citations | Impact Factor (2019) |
|-----------|---------------------------------|-----------|----------------------|
| 1538-7447 | Cancer Research                 | 2116      | 9.727                |
| 0028-0836 | Nature                          | 1491      | 42.779               |
| 1949-2553 | Oncotarget                      | 1447      | 5.168*               |
| 0092-8674 | Cell                            | 1310      | 38.637               |
| 0021-9258 | Journal of Biological Chemistry | 1304      | 4.238                |
| 1932-6203 | Plos One                        | 1300      | 2.740                |
| 1465-7392 | Nature Cell Biology             | 1055      | 20.042               |
| 0950-9232 | Oncogene                        | 952       | 7.971                |
| 1078-0432 | Clinical Cancer Research        | 817       | 10.107               |
| 2045-2322 | Scientific Reports              | 798       | 3.998                |

\*Last impact factor calculated in 2016.

**Table S4.** Top 10 most productive authors publishing articles on the theme.

| Author                        | Affiliation                                                                                                                                                                                          | Documents                                              | Citation |
|-------------------------------|------------------------------------------------------------------------------------------------------------------------------------------------------------------------------------------------------|--------------------------------------------------------|----------|
| Ochiya, Takahiro              | Tokyo Medical University, Tokyo, Japan                                                                                                                                                               | General                                                |          |
|                               |                                                                                                                                                                                                      | 448                                                    | 22790    |
| h-index (2020)                |                                                                                                                                                                                                      | On theme                                               |          |
| 72                            |                                                                                                                                                                                                      | 25                                                     | 3229     |
| Article most cited in general | Minimal information for studies of extracellular vesicles 2018 (MISEV2018): a position statement of the international society for extracellular vesicles and update of the MISEV2014 guidelines (17) | Journal of Extracellular Vesicles, 2018, 7(1), 1535750 | 1459     |
| Article most cited on theme   | Circulating microRNA in body fluid: A new potential biomarker for cancer diagnosis and prognosis (61)                                                                                                | Cancer Science, 2010, 101(10), pp.2087-2092            | 927      |
| Author                        | Affiliation                                                                                                                                                                                          | Documents                                              | Citation |
| Yoshioka, Yusuke              | Tokyo Medical University, Tokyo, Japan                                                                                                                                                               | General                                                |          |

|                               |                                                                                                                                         | 64                                                                                                            | 5258     |
|-------------------------------|-----------------------------------------------------------------------------------------------------------------------------------------|---------------------------------------------------------------------------------------------------------------|----------|
| h-index (2020)                |                                                                                                                                         | On theme                                                                                                      |          |
| 33                            |                                                                                                                                         | 11                                                                                                            | 1100     |
| Article most cited in general | Secretory mechanisms and intercellular transfer of microRNAs in living cells (63)                                                       | Journal of biological chemistry, 2010, 285(23), pp. 17442-17452                                               | 1233     |
| Article most cited on theme   | Exosomes from bone marrow mesenchymal stem cells contains a microRNA that promotes dormancy in metastatic breast cancer cells (48)      | Science Signaling, 2014, 7(332), ra63                                                                         | 336      |
| Author                        | Affiliation                                                                                                                             | Documents                                                                                                     | Citation |
| Antonyak, Marc A.             |                                                                                                                                         | General                                                                                                       |          |
| h-index (2020)                |                                                                                                                                         | 77                                                                                                            | 2793     |
| 32                            |                                                                                                                                         | On theme                                                                                                      |          |
|                               |                                                                                                                                         | 10                                                                                                            | 393      |
| Article most cited in general | Cancer cell-derived microvesicles induce transformation by transferring tissue transglutaminase and fibronectin to recipient cells (64) | Proceedings of the national academy of sciences of the United States of America, 2011, 108(12), pp. 4852-4857 | 296      |
| Article most cited on theme   | RhoA triggers a specific signaling pathway that generates transforming microvesicles in cancer cells (65)                               | Oncogene, 2012, 31(45), pp. 4740-4749                                                                         | 158      |
| Author                        | Affiliation                                                                                                                             | Documents                                                                                                     | Citation |
| Cerione, Richard A.           |                                                                                                                                         | General                                                                                                       |          |
| h-index (2020)                |                                                                                                                                         | 318                                                                                                           | 20420    |
| 77                            |                                                                                                                                         | On theme                                                                                                      |          |
|                               |                                                                                                                                         | 10                                                                                                            | 393      |
| Article most cited in general | Sirt5 is a NAD-dependent protein lysine demethylase and desuccinylase (66)                                                              | Science, 2011, 334(6057), pp. 806-809                                                                         | 740      |
| Article most cited on theme   | RhoA triggers a specific signaling pathway that generates transforming microvesicles in cancer cells (65)                               | Oncogene, 2012, 31(45), pp. 4740-4749                                                                         | 158      |
| Author                        | Affiliation                                                                                                                             | Documents                                                                                                     | Citation |
| Kosaka, Nobuyoshi             |                                                                                                                                         | General                                                                                                       |          |
| h-index (2020)                |                                                                                                                                         | 77                                                                                                            | 8454     |
| 40                            |                                                                                                                                         | On theme                                                                                                      |          |
|                               |                                                                                                                                         | 10                                                                                                            | 1932     |
| Article most cited in general | Secretory mechanisms and intercellular transfer of microRNAs in living cells (63)                                                       | Journal of biological chemistry, 2010, 285(23), pp. 17442-17452                                               | 1233     |
| Article most cited on theme   | Circulating microRNA in body fluid: A new potential biomarker for cancer diagnosis and prognosis (61)                                   | Cancer Science, 2010, 101(10), pp. 2087-2092                                                                  | 927      |
| Author                        | Affiliation                                                                                                                             | Documents                                                                                                     | Citation |
| O'Driscoll, Lorraine          |                                                                                                                                         | General                                                                                                       |          |
| h-index (2020)                |                                                                                                                                         | 121                                                                                                           | 9803     |
| 43                            |                                                                                                                                         | On theme                                                                                                      |          |
|                               |                                                                                                                                         | 10                                                                                                            | 748      |
| Article most cited in general | Biological properties of extracellular vesicles and their physiological functions (67)                                                  | Journal of extracellular vesicles, 2015, 4(2015), pp. 1-60                                                    | 1657     |

| Article most cited on theme   | Intracellular and extracellular microRNAs in breast cancer (68)                                                                                           | Clinical Chemistry, 2011, 57(1), pp. 18-32                                                     | 175      |
|-------------------------------|-----------------------------------------------------------------------------------------------------------------------------------------------------------|------------------------------------------------------------------------------------------------|----------|
| Author                        | Affiliation                                                                                                                                               | Documents                                                                                      | Citation |
| Tang, Jinhai                  | Jiangsu Province Hospital, Nanjing, China                                                                                                                 | General                                                                                        | 5704     |
| h-index (2020)                |                                                                                                                                                           | 226                                                                                            |          |
| 41                            |                                                                                                                                                           | On theme                                                                                       | 595      |
|                               |                                                                                                                                                           | 10                                                                                             |          |
| Article most cited in general | MicroRNA-34a: A potential therapeutic target in human cancer (69)                                                                                         | Cell Death and Disease, 2014, 5(7), e1327                                                      | 180      |
| Article most cited on theme   | Exosomes from drug-resistant breast cancer cells transmit chemoresistance by a horizontal transfer of microRNAs (49)                                      | PLoS ONE, 2014, 9(4), e95240                                                                   | 127      |
| Author                        | Affiliation                                                                                                                                               | Documents                                                                                      | Citation |
| Tamkovich, Svetlana N         | Altair Engineering India Pvt. Ltd., Bengaluru, India                                                                                                      | General                                                                                        | 955      |
| h-index (2020)                |                                                                                                                                                           | 59                                                                                             |          |
| 15                            |                                                                                                                                                           | On theme                                                                                       | 35       |
|                               |                                                                                                                                                           | 9                                                                                              |          |
| Article most cited in general | Circulating DNA and DNase activity in human blood (70)                                                                                                    | Annals of the New York Academy of Sciences, 2006, 1075, pp. 191-196                            | 126      |
| Article most cited on theme   | Exosomes: Generation, structure, transport, biological activity, and diagnostic application (71)                                                          | Biochemistry (Moscow) Supplement Series A: Membrane and Cell Biology, 2016, 10(3), pp. 163-173 | 15       |
| Author                        | Affiliation                                                                                                                                               | Documents                                                                                      | Citation |
| Kasimir-Bauer, Sabine         | Universitäts Klinikum Essen und Medizinische Fakultät, Essen, Germany                                                                                     | General                                                                                        | 3646     |
| h-index (2020)                |                                                                                                                                                           | 128                                                                                            |          |
| 32                            |                                                                                                                                                           | On theme                                                                                       | 103      |
|                               |                                                                                                                                                           | 8                                                                                              |          |
| Article most cited in general | Stem cell and epithelial-mesenchymal transition markers are frequently overexpressed in circulating tumor cells of metastatic breast cancer patients (72) | Breast Cancer Research, 2009, 11(4), R46                                                       | 541      |
| Article most cited on theme   | The prognostic impact of soluble and vesicular HLA-G and its relationship to circulating tumor cells in neoadjuvant treated breast cancer patients (73)   | Human Immunology, 2016, 77(9), pp. 791-799                                                     | 44       |
| Author                        | Affiliation                                                                                                                                               | Documents                                                                                      | Citation |
| Laktionov, Pavel P.           | Institute of Chemical Biology and Fundamental Medicine, SB RAS, Novosibirsk, Russia                                                                       | General                                                                                        | 2452     |
| h-index (2020)                |                                                                                                                                                           | 193                                                                                            |          |
| 25                            |                                                                                                                                                           | On theme                                                                                       | 36       |
|                               |                                                                                                                                                           | 8                                                                                              |          |
| Article most cited in general | Isolation of Extracellular Vesicles: General Methodologies and Latest Trends (74)                                                                         | BioMed Research International, 2018, 2018, 8545347                                             | 238      |
| Article most cited on theme   | Exosomes: Generation, structure, transport, biological activity, and diagnostic application (71)                                                          | Biochemistry (Moscow) Supplement Series A: Membrane and Cell                                   | 15       |

Biology, 2016, 10(3), pp.  
163-173

**Table S5.** Top 10 most productive affiliations.

| Institution                                           | Origin | Documents |
|-------------------------------------------------------|--------|-----------|
| Cornell University                                    | USA    | 36        |
| University of California                              | USA    | 35        |
| Shahid Beheshti University of Medical Sciences        | Iran   | 33        |
| Nanjing Medical University affiliated cancer hospital | China  | 28        |
| Harvard Medical School                                | USA    | 27        |
| National Cancer Center Research Institute             | USA    | 26        |
| Mashhad University of Medical Sciences                | Iran   | 25        |
| Nanjing Medical University                            | China  | 23        |
| Fudan University                                      | China  | 22        |
| Tarbiat Modares University                            | Iran   | 20        |

**Table S6.** Top 10 countries that published on the theme.

| Country | Doc | Country        | Doc |
|---------|-----|----------------|-----|
| USA     | 355 | Iran           | 50  |
| China   | 311 | United Kingdom | 50  |
| Italy   | 83  | South Korea    | 48  |
| Germany | 72  | Canada         | 44  |
| Japan   | 55  | Australia      | 34  |

**Table S7.** List of keywords used in the maps of clusters.

| ITEM                           | CLUSTER | LINKS | OCCURRENCES | AVG. CITA-TIONS | AVG. PUB. YEAR |
|--------------------------------|---------|-------|-------------|-----------------|----------------|
| APOPTOSIS                      | 1       | 17    | 12          | 18              | 2016.92        |
| AUTOPHAGY                      | 1       | 18    | 10          | 17.80           | 2018.90        |
| COLORECTAL CANCER              | 1       | 19    | 10          | 14.50           | 2018.30        |
| DIAGNOSIS                      | 1       | 20    | 22          | 26.32           | 2018.41        |
| HYPOXIA                        | 1       | 23    | 11          | 65.55           | 2017.09        |
| IMMUNOTHERAPY                  | 1       | 22    | 40          | 8.31            | 2017.88        |
| INVASION                       | 1       | 23    | 16          | 30.94           | 2017.44        |
| MESENCHYMAL STEM CELLS         | 1       | 19    | 21          | 44.90           | 2017.90        |
| MIGRATION                      | 1       | 19    | 11          | 22.27           | 2018.55        |
| MIRNA                          | 1       | 32    | 36          | 18.58           | 2018.11        |
| ANGIOGENESIS                   | 2       | 25    | 29          | 19.55           | 2017.34        |
| CANCER                         | 2       | 35    | 120         | 29.68           | 2017.21        |
| CANCER STEM CELLS              | 2       | 19    | 13          | 29.00           | 2017.00        |
| CHEMOTHERAPY                   | 2       | 22    | 19          | 43.37           | 2016.47        |
| DOXORUBICIN                    | 2       | 23    | 13          | 75.62           | 2018.23        |
| EXTRACELLULAR VESICLES (EVS)   | 2       | 6     | 10          | 15.70           | 2018.20        |
| MICROVESICLE                   | 2       | 17    | 11          | 22.55           | 2014.91        |
| MICROVESICLES                  | 2       | 24    | 51          | 36.90           | 2016.27        |
| MULTIDRUG RESISTANCE           | 2       | 14    | 12          | 22.08           | 2015.42        |
| TRIPLE NEGATIVE BREAST CAN-CER | 2       | 12    | 11          | 30.09           | 2018.91        |

|                               |   |    |     |       |         |
|-------------------------------|---|----|-----|-------|---------|
| BREAST CANCER                 | 3 | 41 | 332 | 23.36 | 2018.03 |
| CHEMORESISTANCE               | 3 | 17 | 18  | 22.11 | 2017.94 |
| CYTOKINES                     | 3 | 9  | 10  | 14.80 | 2017.70 |
| EMT                           | 3 | 11 | 12  | 23.75 | 2018.08 |
| EXOSOMES                      | 3 | 44 | 331 | 27.15 | 2017.87 |
| METASTASIS                    | 3 | 38 | 79  | 22.47 | 2017.95 |
| PROTEOMICS                    | 3 | 40 | 18  | 16.83 | 2018.28 |
| TUMOR MICROENVIRONMENT        | 3 | 28 | 49  | 35.24 | 2018.02 |
| BIOMARKERS                    | 4 | 21 | 31  | 26.81 | 2017.48 |
| CIRCULATING TUMOR CELLS       | 4 | 12 | 16  | 15.06 | 2018.19 |
| DRUG DELIVERY                 | 4 | 14 | 21  | 46.81 | 2018.19 |
| EXTRACELLULAR VESICLES        | 4 | 39 | 164 | 14.53 | 2018.22 |
| HER2                          | 4 | 9  | 10  | 17.10 | 2018.30 |
| LIQUID BIOPSY                 | 4 | 17 | 47  | 10.83 | 2019.17 |
| TRIPLE-NEGATIVE BREAST CANCER | 4 | 12 | 11  | 23.27 | 2018.91 |
| CANCER-ASSOCIATED FIBROBLASTS | 5 | 9  | 10  | 25.60 | 2018.90 |
| DRUG RESISTANCE               | 5 | 21 | 29  | 23.69 | 2017.76 |
| MICROENVIRONMENT              | 5 | 15 | 11  | 55.82 | 2016.36 |
| MICRORNAS                     | 5 | 21 | 27  | 40.89 | 2017.48 |
| TUMOR                         | 5 | 13 | 12  | 36.00 | 2017.50 |
| BIOMARKER                     | 6 | 20 | 52  | 28.58 | 2018.12 |
| EXOSOME                       | 6 | 37 | 156 | 31.64 | 2017.77 |
| EXTRACELLULAR VESICLE         | 6 | 19 | 31  | 19.77 | 2017.74 |
| MICRORNA                      | 6 | 28 | 64  | 34.56 | 2017.80 |
| SERUM                         | 6 | 12 | 12  | 31.92 | 2017.25 |
